# Supplementary material for: The middle to late Eocene greenhouse climate modelled using the CESM 1.0.5
Source: Copernicus journal article supplement (doi:10.5194/cp-16-2573-2020), 2020-12-23
Supplement: Supplementary file 1 [file cp-16-2573-2020-supplement.zip]

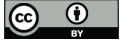

## *Supplement of*

# **The middle to late Eocene greenhouse climate modelled using the CESM 1.0.5**

**Michiel Baatsen et al.**

*Correspondence to:* Michiel Baatsen (m.l.j.baatsen@uu.nl)

- cp-16-2573-2020-supplement-title-page.pdf
- Supplement
  - 38-34Ma\_SSTProxies.xlsx
  - 42-38Ma\_SSTProxies.xlsx
  - SuppFigures\_Tables.pdf

The copyright of individual parts of the supplement might differ from the CC BY 4.0 License.
